# Supplementary material
Source: PubMed Central journal article supplement (PMC6204888)
Supplement: supp_RA118.004138_138373_2_supp_203048_pf7f04.pdf [file supp_RA118.004138_138373_2_supp_203048_pf7f04.pdf]

## Supplemental Material

Table S1. Genotypes and Sources of *Saccharomyces cerevisiae* Strains

| Strain            | Genotype                                                                                                       | mtDNA                               | Source                        |
|-------------------|----------------------------------------------------------------------------------------------------------------|-------------------------------------|-------------------------------|
| W303-1A           | <b>MAT<sub>a</sub></b> <i>ade2-1 his3-1,15 leu2-3,112 trp1-1 ura3-1</i>                                        | $\rho^+$                            | a                             |
| W303-1B           | <b>MAT<sub><math>\alpha</math></sub></b> <i>ade2-1 his3-1,15 leu2-3,112 trp1-1 ura3-1</i>                      | $\rho^+$                            | a                             |
| MR6               | <b>MAT<sub>a</sub></b> <i>ade2-1 arg8::HIS3 his3-1,15 leu2-3,112 trp1-1 ura3-1</i>                             | $\rho^+$ (S288C)                    | Rak <i>et al.</i> 2007        |
| MRS-3A            | <b>MAT<sub>a</sub></b> <i>ade2-1 arg8::HIS3 his3-1,15 leu2-3,112 trp1-1 ura3-1</i>                             | $\rho^+$ (S288C)                    | (McStay <i>et al.</i> , 2013) |
| MRS-3B            | <b>MAT<sub><math>\alpha</math></sub></b> <i>ade2-1 arg8::HIS3 his3-1,15 leu2-3,112 trp1-1 ura3-1</i>           | $\rho^+$ (S288C)                    | (McStay <i>et al.</i> , 2013) |
| MRS-3B $\rho^0$   | <b>MAT<sub><math>\alpha</math></sub></b> <i>ade2-1 arg8::HIS3 his3-1,15 leu2-3,112 trp1-1 ura3-1</i>           | $\rho^0$                            | (McStay <i>et al.</i> , 2013) |
| aDFK $\rho^0$     | <b>MAT<sub>a</sub></b> <i>kar1-1 ade2-10 arg8::URA3 leu2<math>\Delta</math> ura3-52 lys2</i>                   | $\rho^0$                            | (McStay <i>et al.</i> , 2013) |
| DFK $\rho^0$      | <b>MAT<sub><math>\alpha</math></sub></b> <i>kar1-1 ade2-10 arg8::URA3 leu2<math>\Delta</math> ura3-52 lys2</i> | $\rho^0$                            | (McStay <i>et al.</i> , 2013) |
| SCS9S             | <b>MAT<sub><math>\alpha</math></sub></b> <i>kar1ade2-101 arg8::URA3 leu2<math>\Delta</math> ura3-52 lys2</i>   | $\rho^+$ COX2-HAC                   | b                             |
| HMD22             | <b>MAT<sub>a</sub></b> <i>leu2-3,112 ura3-52 lys2 his3<math>\Delta</math> arg8::hisG</i>                       | $\rho^+$<br>cox2::ARG8 <sup>m</sup> | b                             |
| MRS $\Delta$ COX2 | <b>MAT<sub><math>\alpha</math></sub></b> <i>ade2-1 arg8::HIS3 his3-1,15 leu2-3,112 trp1-1 ura3-1</i>           | $\rho^+$<br>cox2::ARG8 <sup>m</sup> | HMD22 x MRS-3B $\rho^0$       |

|                                |                                                                                                                                   |                                                  |                               |
|--------------------------------|-----------------------------------------------------------------------------------------------------------------------------------|--------------------------------------------------|-------------------------------|
| MRSI <sup>0</sup> /COX1-HAC    | <b>MAT<math>\alpha</math></b> <i>ade2-1 his3-1,15 leu2-3,112 trp1-1 ura3-1arg8::HIS3</i>                                          | Intronless mtDNA with COX3-HAC                   | (McStay <i>et al.</i> , 2013) |
| MRS/COX2-pH                    | <b>MAT<math>\alpha</math></b> <i>ade2-1 his3-1,15 leu2-3,112 trp1-1 ura3-1arg8::HIS3</i>                                          | COX2-pH                                          | This study                    |
| MRS/COX2-HA                    | <b>MAT<math>\alpha</math></b> <i>ade2-1 his3-1,15 leu2-3,112 trp1-1 ura3-1arg8::HIS3</i>                                          | COX2-HA                                          | This study                    |
| MRS/COX2-HAC                   | <b>MAT<math>\alpha</math></b> <i>ade2-1 his3-1,15 leu2-3,112 trp1-1 ura3-1arg8::HIS3</i>                                          | COX2-HAC                                         | This study                    |
| W303/COX2-HAC                  | <b>MAT<math>\alpha</math></b> <i>ade2-1 his3-1,15 leu2-3,112 trp1-1 ura3-1</i>                                                    | COX2-HAC                                         | This study                    |
| W303 $\Delta$ COX1/COX2-HAC    | <b>MAT<math>\alpha</math></b> <i>ade2-1 his3-1,15 leu2-3,112 trp1-1 ura3-1</i>                                                    | COX2-HAC, $\Delta$ <i>cox1::ARG8<sup>m</sup></i> | This study                    |
| W303/COX9-HAC                  | <b>MAT<math>\alpha</math></b> <i>ade2-1 his3-1,15 leu2-3,112 trp1-1 ura3-1 cox12::HIS3 leu2::pG16/ST14</i>                        | $\rho^+$                                         | (McStay <i>et al.</i> , 2013) |
| W303 $\Delta$ COX1/COX9-HAC    | <b>MAT<math>\alpha</math></b> <i>ade2-1 his3-1,15 leu2-3,112 trp1-1 ura3-1 cox12::HIS3 cox1::ARG8<sup>m</sup> leu2::pG16/ST14</i> | $\rho^+$                                         | This study                    |
| aW303/SCO1-CH                  | <b>MAT<math>\alpha</math></b> <i>ade2-1 his3-1,15 leu2-3,112 trp1-1 ura3-1 sco1::URA3 trp1::pG41/ST50</i>                         | $\rho^+$                                         | This study                    |
| W303 $\Delta$ SCO1/COX2-HAC    | <b>MAT<math>\alpha</math></b> <i>ade2-1 his3-1,15 leu2-3,112 trp1-1 ura3-1 sco1::URA3 trp1::pG41/ST50</i>                         | COX2-HAC                                         | This study                    |
| aW303/COA6-CH                  | <b>MAT<math>\alpha</math></b> <i>ade2-1 his3-1,15 leu2-3,112 trp1-1 ura3-1 coa6::HIS3 trp1::pCOA6/ST3</i>                         | $\rho^+$                                         | This study                    |
| aW303 $\Delta$ MSS51/COX12-HAC | <b>MAT<math>\alpha</math></b> <i>ade2-1 his3-1,15 leu2-3,112 trp1-1 ura3-1 cox12::HIS3 mss51::HIS3 trp1::pCOX12/ST4</i>           | $\rho^+$                                         | This study                    |

|                                |                                                                                                            |          |                       |
|--------------------------------|------------------------------------------------------------------------------------------------------------|----------|-----------------------|
| aW303/COX13-HAC                | <b>MATa</b> <i>ade2-1 his3-1,15 leu2-3,112 trp1-1 ura3-1 cox12::HIS3 trp1::pCOX13/ST4</i>                  | $\rho^+$ | (McStay et al, 2013a) |
| aW303 $\Delta$ MSS51/COX13-HAC | <b>MATa</b> <i>ade2-1 his3-1,15 leu2-3,112 trp1-1 ura3-1 cox12::HIS3 mss51::HIS3 trp1::pCOX13/ST4</i>      | $\rho^+$ | This study            |
| aW303 $\Delta$ COX16           | <b>MATa</b> <i>ade2-1 his3-1,15 leu2-3,112 trp1-1 ura3-1 cox16::URA3</i>                                   | $\rho^+$ | (Carlson et al, 2003) |
| aW303/COX16-CH                 | <b>MATa</b> <i>ade2-1 his3-1,15 leu2-3,112 trp1-1 ura3-1 cox16::URA3 trp1::pG22/ST13</i>                   | $\rho^+$ | This study            |
| aW303 $\Delta$ MSS51/COX16-CH  | <b>MATa</b> <i>ade2-1 his3-1,15 leu2-3,112 trp1-1 ura3-1 cox16::URA3 trp1::pG22/ST13 mss51::HIS3</i>       | $\rho^+$ | This study            |
| aW303 $\Delta$ COX18           | <b>MATa</b> <i>ade2-1 his3-1,15 leu2-3,112 trp1-1 ura3-1 cox18::URA3</i>                                   | $\rho^+$ | (Souza et al, 2000)   |
| aW303 $\Delta$ COX18-HAC       | <b>MAT<math>\alpha</math></b> <i>ade2-1 his3-1,15 leu2-3,112 trp1-1 ura3-1 cox18::URA3 leu2::pG34/ST13</i> | $\rho^+$ | This study            |
| aW303 $\Delta$ COX20           | <b>MATa</b> <i>ade2-1 his3-1,15 leu2-3,112 trp1-1 ura3-1 cox20::URA3</i>                                   | $\rho^+$ | (Hell et al, 2000)    |
| aW303 $\Delta$ COX20-HAC       | <b>MATa</b> <i>a ade2-1 his3-11,15 leu2-3,112 trp1-1 ura3-1 cox20::URA3 leu2::pG92/ST20</i>                | $\rho^+$ | This study            |
| aW303 $\Delta$ PET100          | <b>MATa</b> <i>ade2-1 his3-1,15 leu2-3,112 trp1-1 ura3-1 pet100::URA3</i>                                  | $\rho^+$ | This study            |
| aW303 $\Delta$ PET100-CH       | <b>MATa</b> <i>ade2-1 his3-1,15 leu2-3,112 trp1-1 ura3-1 pet100::URA3 trp1::pG135/ST6</i>                  | $\rho^+$ | This study            |
| W303 $\Delta$ PET117           | <b>MAT<math>\alpha</math></b> <i>ade2-1 his3-1,15 leu2-3,112 trp1-1 ura3-1 pet117::HIS3</i>                | $\rho^+$ | This study            |

W303/PET117-CH

**MAT $\alpha$**  *ade2-1 his3-1,15 leu2-3,112*  
*trp1-1 ura3-1 pet117::HIS3*  
*trp1::pG8/ST10*

$\rho^+$

This study

---

<sup>a</sup> Rodney Rothstein, Department of Human Genetics and Development, Columbia University

<sup>b</sup> Thomas Fox, Department of Molecular Biology and Genetics, Cornell University

Table S2. Sequences of primers

| Primer name | Primer sequence (5' -> 3')                                                          |
|-------------|-------------------------------------------------------------------------------------|
|             | <i>Primer used to amplify a COX2-HA hybrid gene</i>                                 |
| cox2-5      | ggcgagtccttgctgcatacctttat                                                          |
| cox2-13     | ggcggatccttattaagcgtagctcgggacgctgatgggtattgttcatttaattccaaaaattagg                 |
| cox2-11     | ggcggatccttaattacttattattataatattttaa                                               |
| cox2-12     | ggcctgcagcaaggatactatcaaaaatagttac                                                  |
|             | <i>Primers used to amplify the mitochondrial COX2-HAC hybrid gene</i>               |
| cox2-5      | ggcgagtccttgctgcatacctttat                                                          |
| HA-proC     | ggcggatccttacttaccatcgattaaccgtggatctacctgatcttcacctccagcgtagctcgggacgctgta         |
|             | <i>Primers used to construct nuclear genes expressing HAC or CH tagged proteins</i> |
| cox18-1     | gaaaggcggatcccaaatgagtttaataagagatg                                                 |
| cox18-2     | ggcgagctcctcaagcgtagctcgggacgctgatcgttggaaggataaatccaa                              |
| C-phs       | ggcctgcagtcattaccatcgattaatcttggatctacttgatcttctcctccagcgtagctcgggacgctgatgg        |
| cox20-1     | ggcggatcccaactagctctattagtt                                                         |
| cox20-2     | ggcgagctcctcaagcgtagctcgggacgctgtaatgggaccagaactgtaccatttctt                        |
| cox16-1     | ggcgagctcctcgggaaggttcaactcat                                                       |
| cox16-2     | ggcctgcagccagacattctcagattcatc                                                      |
| pet100-3    | ggcgagctccgctccatcattagatccttc                                                      |
| pet100-5    | ggcctgcagtcctttttgagagccaaatcccg                                                    |
| pet117-1    | ggcgagctccgctccatcattagatccttc                                                      |
| pet117-2    | ggcctgcagtcctttttgagagccaaatcccg                                                    |
| cyc1-1      | ggcgagctcatggagaaaggagtataatg                                                       |
| cyc1-2      | ggcctgcagtttcttagattcttaaccac                                                       |
| sco1-1      | ggcgagctccaatcgcgatgctatcactc                                                       |
| sco1-2      | ggcggatcctttgaataagaaggagtaccatgc                                                   |
| coa6-5      | ggcgagctcgcgatggtatattggcacctgagc                                                   |
| coa6-6      | ggcctgcagctgattcgttcctctgttttag                                                     |

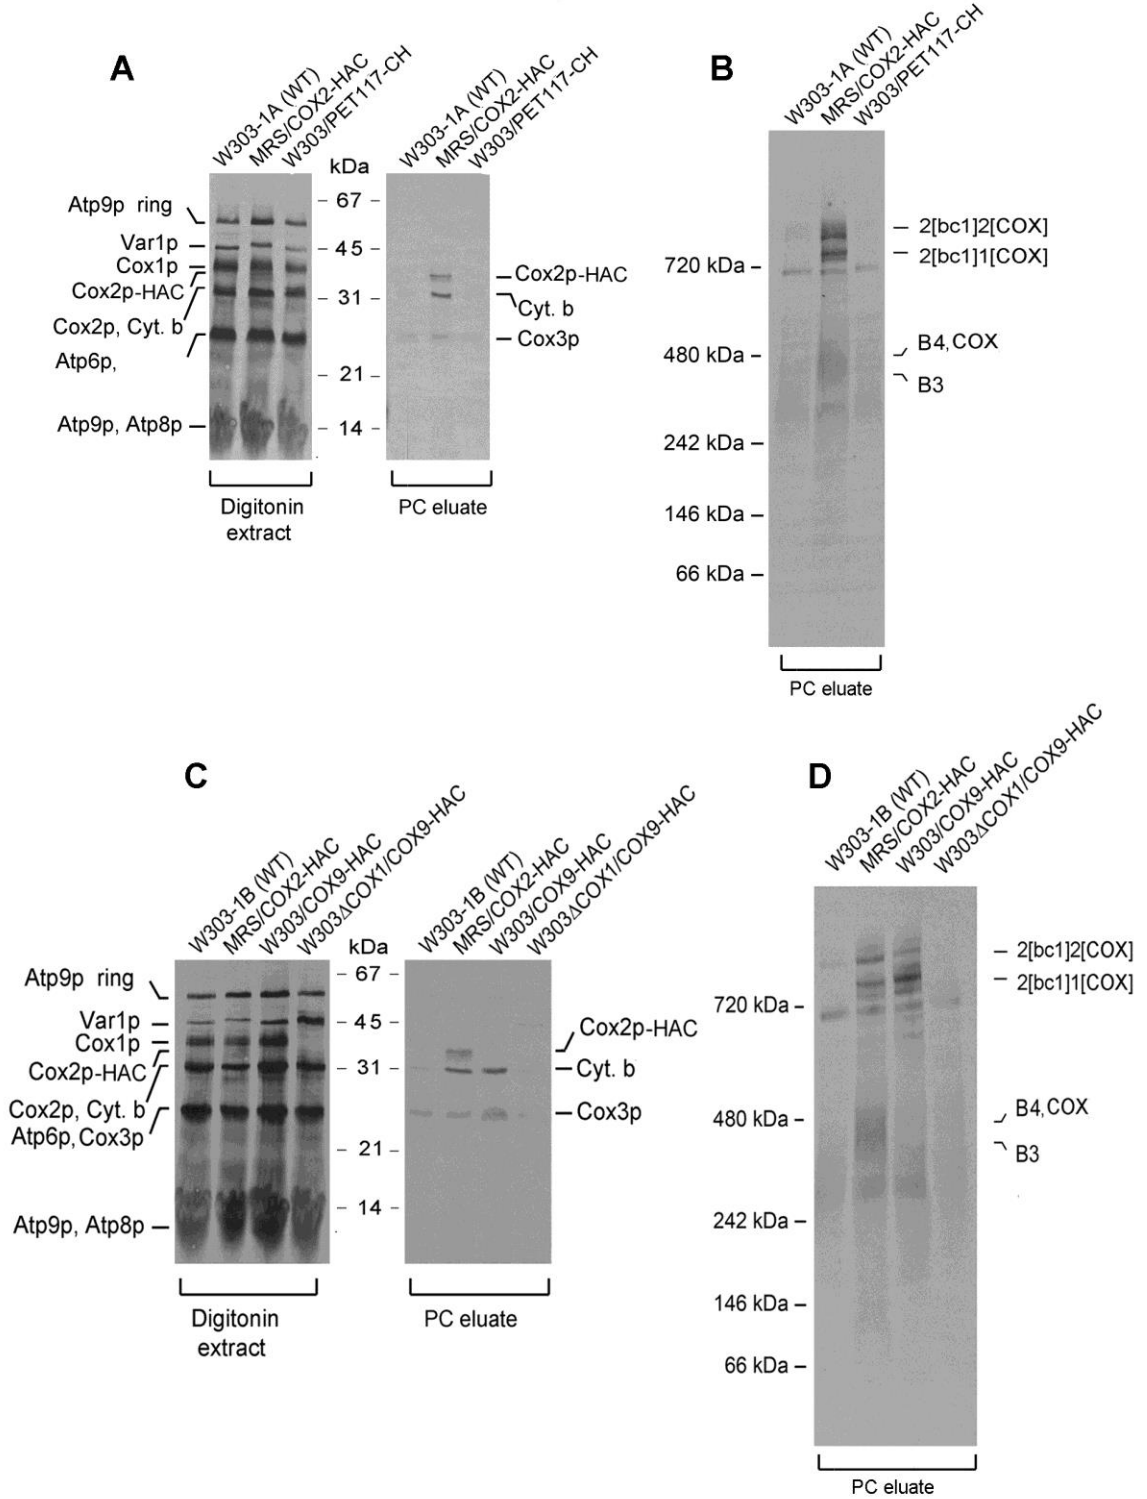

Fig. S1. Pull-down assays of radiolabeled mitochondrial gene products of strains expressing Cox9p-HAC and Pet117p-CH. Mitochondria of the respiratory competent strain W303-1B and of strains expressing tagged Cox2 (MRS/COX2-HAC), Cox9 (W303/COX9-HAC) and Pet117 (W303/PET117-CH) with and without an additional *mss51* mutation, were grown in 2% YPGal to early stationary phase. The cells were harvested and inoculated into the same volume of fresh YPGal plus 2 mg/ml chloramphenicol and shaken for an additional 2 hours at 30°C. **A.** Mitochondria were labeled for 20 min and chased for 10 min after addition of puromycin and excess cold methionine. The labeled mitochondria were extracted with digitonin and protein C tagged proteins were purified on protein C antibody beads. The digitonin extracts and eluates from the protein C antibody beads (PC eluates) were separated by SDS-PAGE on a 12% polyacrylamide gel. Proteins were blotted onto nitrocellulose and exposed to X-ray film. **B.** The PC eluates from **A** were separated by BN-PAGE on a 4-13% polyacrylamide. Proteins were transferred to a PVDF membrane and exposed to X-ray film. **C.** Mitochondria from the indicated strains were labeled and further processed as in **A**. **D.** The PC eluates from **C** were transferred to a PVDF membrane and exposed to X-ray film. The radiolabeled mitochondrial products and assembly intermediates are marked in the margins of the autoradiograms.
